# Supplementary material
Source: publisher figshare collection journal article supplement (https://sage.figshare.com/ndownloader/files/16450268)
Supplement: Supplementary file 1 [file 16450268]

**Supplementary table 1. Index operation and supplementary operation characteristics**

|                                                | Modified peritoneal flap hernioplasty technique (n=78) | Retromuscular mesh technique (n=96) | p-value              |
|------------------------------------------------|--------------------------------------------------------|-------------------------------------|----------------------|
| <b>Index operation</b>                         |                                                        |                                     |                      |
| Upper gastrointestinal surgery                 |                                                        |                                     | 0.597*               |
| Malignancy                                     | 1 (1%)                                                 | 2 (2%)                              |                      |
| Non-malignancy                                 | 14 (18%)                                               | 19 (20%)                            |                      |
| Colorectal surgery                             |                                                        |                                     |                      |
| Malignancy                                     | 13 (17%)                                               | 8 (8%)                              |                      |
| Non-malignancy                                 | 22 (28%)                                               | 26 (27%)                            |                      |
| Hernia repair (primary or incisional)          |                                                        |                                     |                      |
| Suture-based technique                         | 3 (4%)                                                 | 6 (6%)                              |                      |
| Mesh-based technique                           | 5 (6%)                                                 | 4 (4%)                              |                      |
| Advanced abdominal wall surgery <sup>a</sup>   | 9 (12%)                                                | 13 (14%)                            |                      |
| Gynaecological surgery                         |                                                        |                                     |                      |
| Malignancy                                     | 1 (1%)                                                 | 2 (2%)                              |                      |
| Non-malignancy                                 | 2 (3%)                                                 | 6 (6%)                              |                      |
| Thoracic surgery (CABG or heart valve surgery) | 0 (0%)                                                 | 3 (3%)                              |                      |
| Urological surgery for malignancy              | 6 (8%)                                                 | 7 (7%)                              |                      |
| Vascular surgery                               | 2 (3%)                                                 | 0 (0%)                              |                      |
| <b>Operation characteristics</b>               |                                                        |                                     |                      |
| Anaesthesia                                    |                                                        |                                     | < 0.001 <sup>†</sup> |
| General anaesthesia                            | 62 (80%)                                               | 94 (98%)                            |                      |
| General anaesthesia and epidural               | 16 (21%)                                               | 2 (2%)                              |                      |

\* Fisher's exact test | <sup>†</sup> Pearson's  $\chi^2$  test | <sup>a</sup> Advanced abdominal wall surgery includes open abdomen treatment, enterocutaneous fistula and wound dehiscence.
